# Supplementary material for: Asymmetric diversification of mating pheromones in fission yeast
Source: PLoS Biol. 2019 Jan 22;17(1):e3000101. doi: 10.1371/journal.pbio.3000101 (PMC6342294; doi:10.1371/journal.pbio.3000101)
Supplement: S5 Table — (XLSX) [file pbio.3000101.s012.xlsx]

## Sheet: Sheet1
S5 Table. Primers used in this study.
Name	Sequence (5' to 3')
oTS35	CCAGATCTGTTTAGCTTGCCTCGTC
oTS36	CCTGCAGCGTACGAAGCTTCA
oTS37	GGATCTGCCGGTCTCCCTATAGT
oTS38	TATCGAATCGACAGCAGTATAGCGACC
oTS46	GCTAAACAGATCTGGAATCTTAGCCCGGGATTCCAAATCC
oTS47	GCTGTCGATTCGATACACCACCCAAGCCATGAGTTTC
oTS48	GAGACCGGCAGATCCCGGTATCACAGTGGTCG
oTS55	GAGAATTCCACTATTACAGATGTCAATATTACTGCC
oTS56	GGCAACTGGAATAGGTGAGGCAG
oTS57	CCTATTCCAGTTGCCTCACCTTTGGATCAATTGCCCAGC
oTS58	AATAGTGGAATTCTCGGGAACGTTCATGACATAAAATTCCAAGAAAT
oTS71	ACTGAAGAAGATGAAGAGAATGAGGAAGAGG
oTS72	GCTAACTGAAACCACACCAGGATCG
oTS73	AAAACTTATGCTGATTTCCTTCGTGCTTACCAAAGTTGGAACACTTTTGTTAATCCTGACAGACCCAACTTGAAAAAGCGC
oTS74	GTGGTTTCAGTTAGCAAAACTTATGCTGATTTCCTTCGT
oTS75	TTCATCTTCTTCAGTGCGCTTTTTCAAGTTGGG
oTS78	TTCGTACGCTGCAGGGGAGCTTCCTCTCCCGATTCTTAA
oTS79	CCCTATAGTGAGTCGTATTACGCGC
oTS80	CCTTTAGTGAGGGTTAATTGCGCG
oTS81	AACCCTCACTAAAGGCTGATTCTCATGTTCGAGGGAAAAAAAGC
oTS82	CGACTCACTATAGGGCAGTAATCAGAGAGCTTAAAACCGTTCTGAAT
oTS83	GGAAGCTTGCTGTTGGGATAGCTTTG
oTS84	GCAAGCTTGCTCTAGTACCACAGCGTATG
oTS85	ATTTGCTAGTTCATCGCTTAAACTATCTTTCT
oTS86	TGCTTCACATGGCTTTGTAAAGATGTG
oTS89	TACGTTGAGTTTACCATGAGACAACCATGGTGGAAAGAC
oTS90	GCTAAACAGATCTGGATAACTGTGCATTTATAATTGTTCGGCAGT
oTS91	CTCTTTTGTTTGCGCATCGTCTTTC
oTS92	GGTCGCAGTATAGAAGATTTGGATCTGG
oTS93	GCGCTTTTTCAAGTTGGGTCTGTCAGGATTAACAAAAGTGTTCCAACTTTGGTAAGCACGAAGGAAATCAGCATAAGTTTT
oTS99	TTCGTACGCTGCAGGCATAAAACACTTCTATTTTGTTTTCTCGAAGCCA
oTS149	CTTACGCCTGAATGTATCTTTTTTGATAATTCCT
oTS150	AATGTCAGAGGGAGCAAGAACAATATAAACC
oTS151	ACTGAGTCATCAAGTGCTTTACAAATCAC
oTS152	CTCTGAGCAAATTATGATTACAAGCCTATCG
oTS157	GAAATTCTATATAGGTCTTTGTGTACCA
oTS158	CAAAATTCCTACCACTTACGCT
oTS171	GTGGTTTCAGTTAGCAAAACTTATGCT
oTS174	TGCGGCCTCAAACTC GCGCTTTTTCAAGTTGGGTCTG
oTS175	GAGTTTGAGGCCGCACCTGCT AAAACTTATGCTGATTTCCTTCGTGCT
oTS176	CGCAGCCTCGAATTC GCGCTTTTTCAAGTTGGGTCTG
oTS177	GAATTCGAGGCTGCGCCAGAG AAAACTTATGCTGATTTCCTTCGTGCT
oTS178	GGCCGGAGCCGCTTCAAATTC GCGCTTTTTCAAGTTGGGTCTG
oTS179	GAAGCGGCTCCGGCC AAAACTTATGCTGATTTCCTTCGTGCT
oTS202	TTACCAAAGTTGGAACACTTTTGCTAATCCTGACAGAC
oTS203	ACACGAAGGAAATCAGCATATGATTTGCTAACTGAAACC
oTS204	CCTTCGTGCTTACCATAGTTGGAACAC
oTS205	AAATCAGCATAACTTTTGCTAACTGAAACCACACCAGG
oTS215	GTGGTTTCAGTTAGCAAATCATATGCTGAT
oTS216	TGCGGCCTCAAACTCGCGCTTTTTCAAGTTGGGTCTG
oTS217	GAGTTTGAGGCCGCACCTGCTAAATCATATGCTGATTTCCTTCGTGTTT
oTS218	CGCAGCCTCGAATTCGCGCTTTTTCAAGTTGGGTCTG
oTS219	GAATTCGAGGCTGCGCCAGAGAAATCATATGCTGATTTCCTTCGTGTTT
oTS220	GGCCGGAGCCGCTTCAAATTCGCGCTTTTTCAAGTTGGGTCTG
oTS221	GAAGCGGCTCCGGCCAAATCATATGCTGATTTCCTTCGTGTTT
oTS222	GTGGTTTCAGTTAGCAAAAGTTATGCTGAT
oTS223	GAGTTTGAGGCCGCACCTGCTAAAAGTTATGCTGATTTCCTTCGTGCT
oTS224	GAATTCGAGGCTGCGCCAGAGAAAAGTTATGCTGATTTCCTTCGTGCT
oTS225	GAAGCGGCTCCGGCCAAAAGTTATGCTGATTTCCTTCGTGCT
oTS299	GATTACGCCAAGCTTGACATGGAGGCCCAGAATACCC
oTS300	CAGGCATGCAAGCTTCAGTATAGCGACCAGCATTCACA
oTS301	AAGCTTGCATGCCTGCAGG
oTS302	AAGCTTGGCGTAATCATGGTCATAGC
oTS305	CCGGGTAAAAGGAATGTCTCCCT
oTS306	ATATGATTTAACAAAGCGACTATAAGTCAGAAAGTGAGA
oTS401	GTTAATCCTGACAGACCCAACTTGAAAAAGC
oTS402	AAAAGTGTTCCAACTTTGGTAAACACGAAG
oTS403	CTTGACAGACCCAACTTGAAAAAGCG
oTS404	ATTAACAAAAGTGTTCCAACTTTGGTAAGCA
oTS504	ACAGCTTTCAATTCACTCTCACG
oTS505	TCTGGGGAATTGGCATTTTGC
oTS506	TCAACAGTTTTCAATTCACTCTCAAGTC
oTS507	ACGACAGATTCCGGATTTGGTAATTGAAG
oTS508	GAGTGGATGTAGTACAAACTAAGAATGTTCAGC
oTS509	ACTCTTGCATCTACTTTTGACAATAGTCAATCG
oTS510	GCGACTCAAATTTTGTTAGCATCTCCATATTC
oTS586	GCTCCCTCTGACATTATGAGACAACCATGGTGGAAAGACT
oTS587	ACATTCAGGCGTAAGTTACGTCCACTTTTTAGTTTCAGATTCATCAGAAATC
oTS598	GAATTCGAGGCTGCGCCAGAGAAATCATATGCTGATTTCCTTCGTGCT
oTS599	GAAGCGGCTCCGGCCAAATCATATGCTGATTTCCTTCGTGCT
oTS600	GAGTTTGAGGCCGCACCTGCTAAAACTTATGCTGATTTCCTTCGTGTT
oTS601	GAATTCGAGGCTGCGCCAGAGAAAACTTATGCTGATTTCCTTCGTGTT
oTS602	GAAGCGGCTCCGGCCAAAACTTATGCTGATTTCCTTCGTGTT
oTS624	TTCGTACGCTGCAGGATTTCTATACTATAATTCAAGAACGGATCAACAG
oTS625	GCTAAACAGATCTGGAAAGCTTCCGTTGACTCTTGATC
oTS626	GCTAAACAGATCTGGCGGTATCACAGTGGTCGAGGAATTATTGAG
oTS627	AAGTTTAATATCGGAAAATTTAAAATACAAGTTTATTGACTTACC
oTS628	TGAAAAGAGAGACAATGATTTTGAGCCTATGAG
oTS633	GGTAGCAGGAATAGGAGCGGC
oTS634	TTCAACTCTACCGTCGCACAGACC
oTS635	CCTATTCCTGCTACCGATCCTGGTGTGGTTTCAGTTAGCAAG
oTS636	GACGGTAGAGTTGAATGGGACAGTCATGATATAAAACTGAAGAAAGC
oTS647	TTAATTTAGCGCTAACGCTTTTCTC
oTS648	CCACATCAGTGGTAAGTCAATAAAC
oTS658	GCGGCATATACAACTACGATTG
oTS664	TTGTCTCTCTTTTCAATGCTGTCTTTATTTTTGAAATC
oTS665	TCCGATATTAAACTTTTAATAAAGCAACGTATTTTCAAGC
oTS729	TTTGTTAAATCATATATGCTGTCTTTATTTTTGAAATCTCTTTTTGC
oTS730	ATTCCTTTTACCCGGTTAATAAAGCAACGTATTTTCAAGCCATTCTCTA
oTS885	TAACGCCAGGGTTTTCCCAGTC
oTS886	TTTCGCCAGCTGGCGTAATAG
oTS887	AAAACCCTGGCGTTACTGATTCTCATGTTCGAGGGAAAAAAAGC
oTS888	CGCCAGCTGGCGAAACAGTAATCAGAGAGCTTAAAACCGTTCTG
