# Supplementary material for: Asymmetric diversification of mating pheromones in fission yeast
Source: PLoS Biol. 2019 Jan 22;17(1):e3000101. doi: 10.1371/journal.pbio.3000101 (PMC6342294; doi:10.1371/journal.pbio.3000101)
Supplement: S6 Table — (XLSX) [file pbio.3000101.s013.xlsx]

## Sheet: Sheet1
S6 Table. Plasmids used in this study.
Name	Relevant characteristics	Length (bp)
pTS5	pFA6a-kanMX6(Somap2DOWN)	4823
pTS10	pBS-ade6(map2_P2_1repeat)	7874
pTS11	pFA6a-kanMX6(Somap2UPDOWN)	5861
pTS13	pBS-ade6(map2+)	8180
pTS14	pFA6a-hphMX6(mam2+)	7174
pTS15	pBS-ade6(map2So)	8492
pTS47	pBS-ade6(map2_P2_2repeats)	7976
pTS48	pBS-ade6(map2_P2_4repeats)	8180
pTS54	pBS-ade6(map2_P1_1repeat)	7874
pTS55	pBS-ade6(map2_P3_1repeat)	7874
pTS59	pBS-ade6(map2_P1_4repeats)	8180
pTS60	pBS-ade6(map2_P3_4repeats)	8180
pTS66	pBS-ade6(map2_P2_3repeats)	8078
pTS111	pREP1-kanMX6	7911
pTS137	pBS-ade6(map2_4repeats_D9)	8180
pTS138	pBS-ade6(map2_5repeats_D1)	8282
pTS139	pBS-ade6(map2_5repeats_D11)	8282
pTS140	pBS-ade6(map2_5repeats_D5)	8282
pTS141	pBS-ade6(map2_6repeats_D3)	8384
pTS142	pBS-ade6(map2_6repeats_D8)	8384
pTS143	pBS-ade6(map2_7repeats_D10)	8486
pTS144	pBS-ade6(map2_8repeats_D7)	8588
pTS145	pBSade6(map2_P4_1repeat)	7874
pTS146	pBSade6(map2_P5_1repeat)	7874
pTS147	pBSade6(map2_P4_4repeats)	8180
pTS148	pBSade6(map2_P5_4repeats)	8180
pTS189	pBS-ade6(mfm1So)	6545
pTS224	pFA6a-hphMX6(mam2_F1)	7174
pTS225	pFA6a-hphMX6(mam2_F2)	7174
pTS226	pFA6a-hphMX6(mam2_F3)	7174
pTS227	pFA6a-hphMX6(mam2_F5)	7174
pTS228	pBS-ade6(map2_P-factor-T1S_1repeat)	7874
pTS229	pBS-ade6(map2_P-factor-A8V_1repeat)	7874
pTS230	pBS-ade6(map2_P-factor-V16A_1repeat)	7874
pTS231	pBS-ade6(map2_P-factor-A8V,V16A_1repeat)	7874
pTS232	pBS-ade6(map2_P-factor-T1S,V16A_1repeat)	7874
pTS233	pBS-ade6(map2_P6_1repeat)	7874
pTS234	pBS-ade6(map2_P-factor-T1S_4repeats)	8180
pTS235	pBS-ade6(map2_P-factor-A8V_4repeats)	8180
pTS236	pBS-ade6(map2_P-factor-V16A_4repeats)	8180
pTS237	pBS-ade6(map2_P-factor-A8V,V16A_4repeats)	8180
pTS238	pBS-ade6(map2_P-factor-T1S,V16A_4repeats)	8180
pTS239	pBS-ade6(map2_P6_4repeats)	8180
pTS243	pBS-ade6(map2_P1-P2-P3-P2)	8180
pTS244	pBS-ade6(map2_P2-P3-P2-P1)	8180
pTS245	pBS-ade6(map2_P5-P2-P5-P2)	8180
pTS246	pFA6a-natMX6(sxa2+)	7191
pTS247	pFA6a-natMX6(So-map2+)	6921
pTS250	pFA6a-natMX6(So-map2Sp)	6591
pTS252	pFA6a-natMX6(sxa2_G1)	7191
pTS255	pFA6a-natMX6(sxa2_G4)	7191
pTS258	pFA6a-natMX6(sxa2_G7)	7191
pTS270	pBS-ade6(map2_4repeats_D13)	8180
pTS284	pREP1-kanMX6(sxa2+)	9417
pTS336	pBS-ade6(map2_P1_4repeats_2genes)	10755
pTS337	pBS-ade6(map2_P2_4repeats_2genes)	10755
pTS338	pBS-ade6(map2_P3_4repeats_2genes)	10755
pTS339	pBS-ade6(map2_P4_4repeats_2genes)	10755
pTS340	pBS-ade6(map2_P5_4repeats_2genes)	10755
pTS341	pBS-ade6(map2_P6_4repeats_2genes)	10755
